# Supplementary material
Source: Springer Nature journal article supplement (https://www.springermedizin.de/resource/supplementary/12943_2009_734_MOESM6_ESM.pdf/9554690)

Healthy liver

20W DEN

30W DEN

Tie2

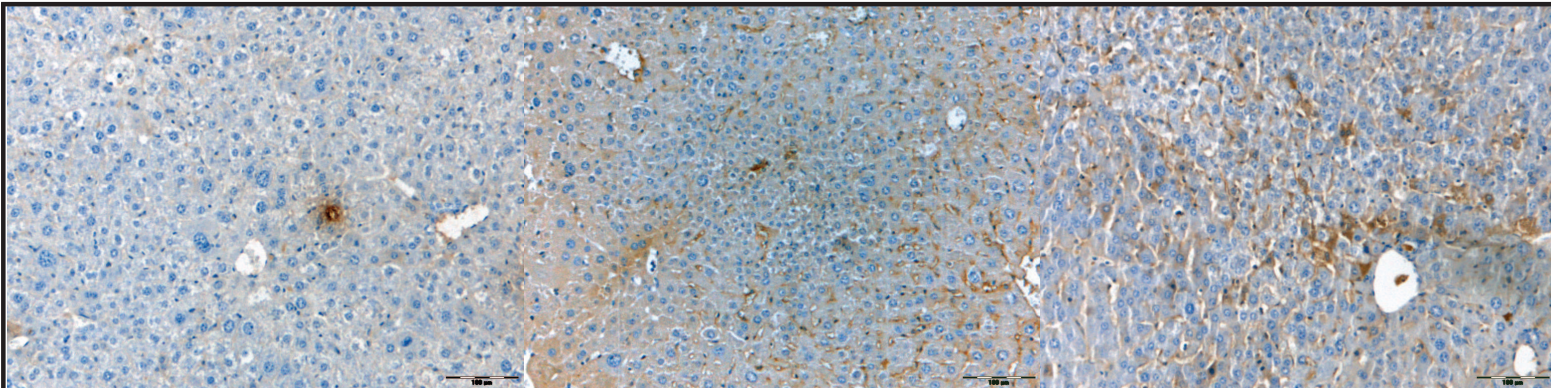

VEGF

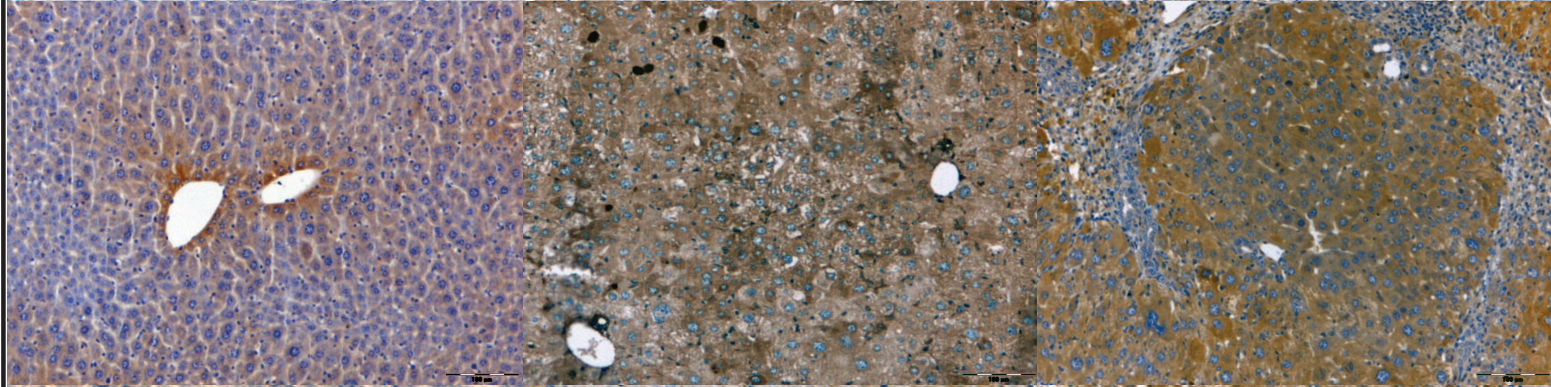

HIF1-alpha

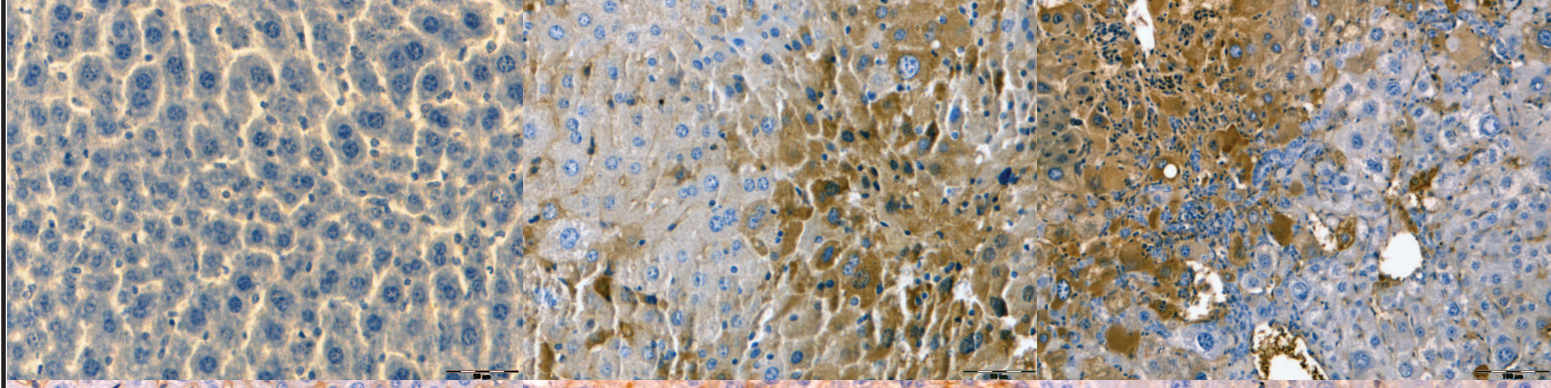

CD105

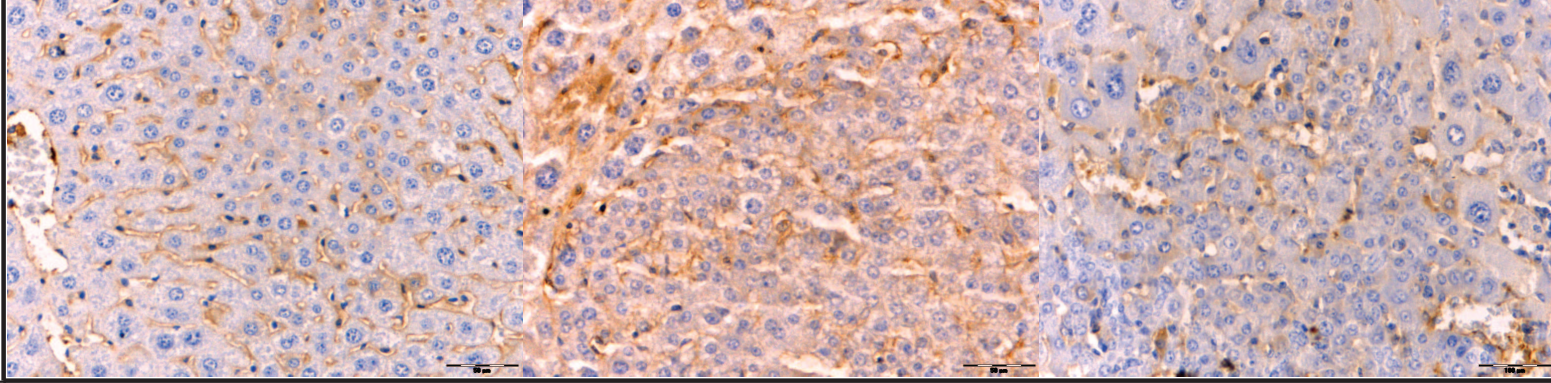

Supplement: MOESM6 [file 9554690]
